# Supplementary material for: An rht-type metal–organic framework constructed from an unsymmetrical ligand exhibiting high hydrogen uptake capability
Source: Royal Society of Chemistry journal article supplement (doi:10.1039/c4ra07101h), 2014-10-08
Supplement: c4ra07101h1.pdf [file c4ra07101h1.pdf]

Electronic Supplementary Information for

**An *rht*-type metal-organic framework constructed from an unsymmetrical ligand  
exhibiting high hydrogen uptake capability**

**Jian Li,<sup>‡a</sup> Pei-Zhou Li,<sup>‡b</sup> Qiu-Yan Li,<sup>a</sup> Yang Cao,<sup>a</sup> Han Lu,<sup>a</sup> Hui Wu,<sup>c</sup> Fei Li,<sup>d</sup> Yanhui Shi,<sup>a</sup> Xiao-Jun Wang<sup>\*a</sup>  
and Yanli Zhao<sup>\*b</sup>**

<sup>a</sup> School of Chemistry and Chemical Engineering and Jiangsu Key Laboratory of Green Synthetic Chemistry for Functional Materials, Jiangsu Normal University, Xuzhou 221116, P. R. China. E-mail: [xjwang@jsnu.edu.cn](mailto:xjwang@jsnu.edu.cn)

<sup>b</sup> Division of Chemistry and Biological Chemistry, School of Physical and Mathematical Sciences, Nanyang Technological University, 637371, Singapore. E-mail: [zhaoyanli@ntu.edu.sg](mailto:zhaoyanli@ntu.edu.sg)

<sup>c</sup> Key Laboratory of Biotechnology for Medicinal Plants of Jiangsu Province, Jiangsu Normal University, Xuzhou 221116, P. R. China.

<sup>d</sup> Department of Chemistry & Chemical Biology, University of New Mexico, 300 Terrace St. NE, Albuquerque, NM, 87131-0001, USA.

<sup>‡</sup> These authors contributed equally to this work.

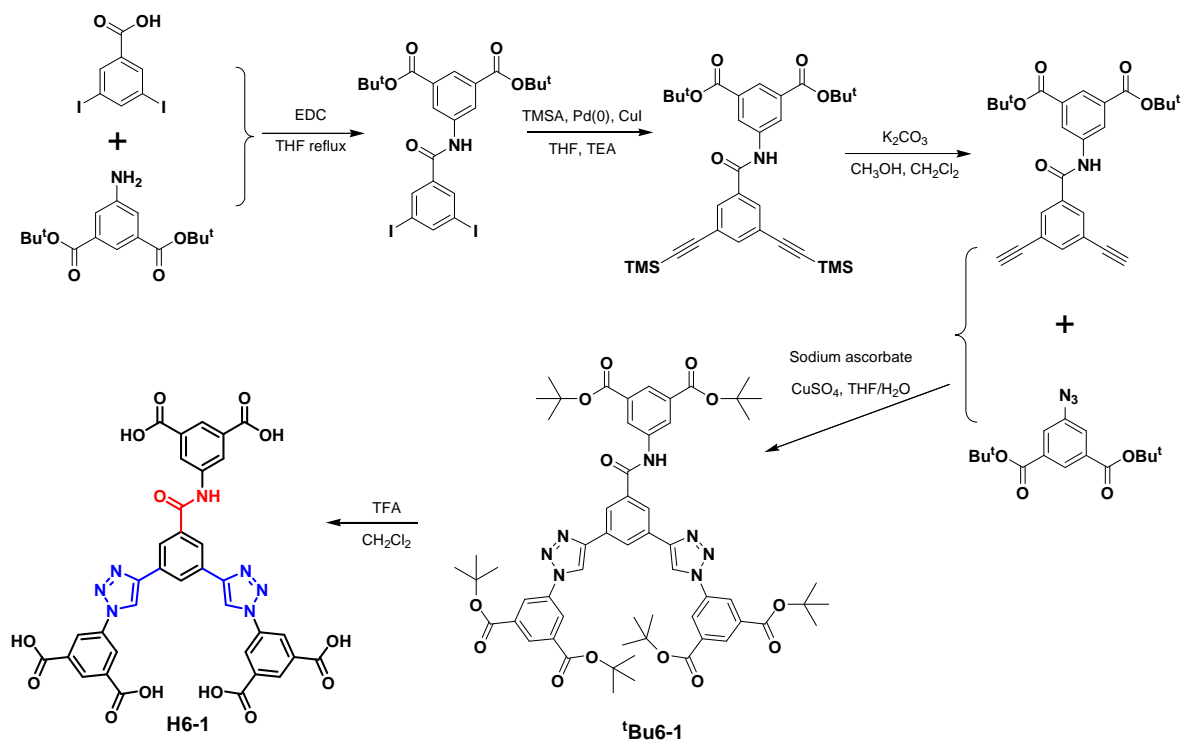

**Scheme S1.** Synthetic route for ligand **H6-1**. EDC = 1-ethyl-3-(3-dimethylaminopropyl)carbodiimide; THF = tetrahydrofuran; TMSA = trimethylsilyl acetylene; TEA = triethylamine; TFA = trifluoroacetic acid.

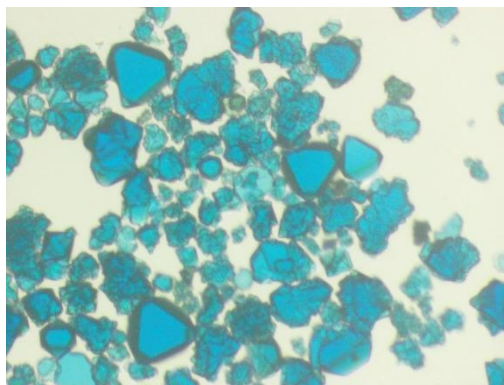

**Fig. S1** The photograph of crystals of as-synthesized **Cu-ABTA**, showing they have good and regular morphologies and shapes.

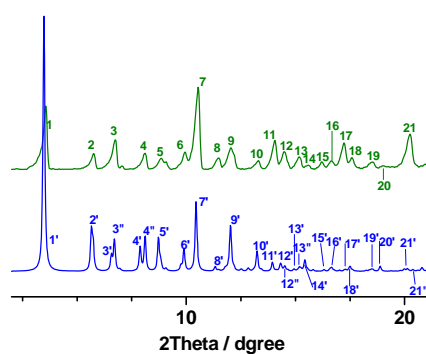

**Fig. S2** The zoomed-in comparison of PXRD patterns ( $2\theta = 2-21^\circ$ ) of as-synthesized MOF **Cu-ABAT** (upper) and simulation from MOF **NTU-105** (bottom) single crystal data. Although some of peaks in **NTU-105** ( $3'$  and  $3''$ ;  $4'$  and  $4''$ ;  $12'$  and  $12''$ ;  $13'$  and  $13''$ ;  $21'$  and  $21''$ ) are merged into corresponding one peak in **Cu-ABTA**, mainly due to the different organic ligand in the two MOFs. However, most of the position of main peaks matches very well. This indicates that the overall framework structure of **Cu-ABTA** is the same as that of MOF **NTU-105**.

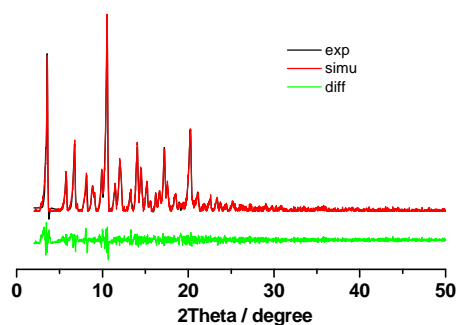

**Fig. S3** Experimental (black), calculated (red), and difference (green below observed and calculated patterns) X-ray powder diffraction profiles for **Cu-ABTA**. All diffraction patterns were indexed using DICVOL9113 to obtain lattice parameters that were subsequently refined in a Pawley fit. A modified Thompson-Cox-Hastings pseudo-Voigt profile function with a simple axial correction was used in TOPAS (Topas V3.0: General Profile and Structure Analysis Software for Powder Diffraction Data Bruker AXS Ltd, 2004). The cell parameters are  $a = 30.03 \text{ \AA}$ ,  $b = 30.03 \text{ \AA}$ ,  $c = 43.11 \text{ \AA}$ ,  $\alpha = 90^\circ$ ,  $\beta = 90^\circ$ ,  $\gamma = 90^\circ$  with a tetragonal space group  $I4/m$ , which are close to these of **NTU-105**. The results of PXRD measurements and simulation indicate that **Cu-ABTA** still possesses the same (3,24)-connected *rht*-framework as our reported MOF **NTU-105**.

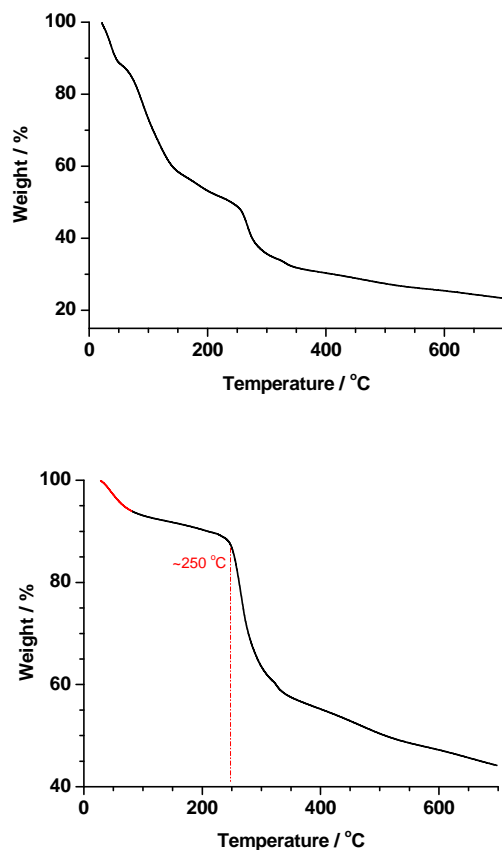

**Fig. S4** TGA plot of as-synthesized (upper) and desolvated (bottom) MOF **Cu-ABTA**. The initial weight loss (red line) of activated sample can be attributed to the readsorbed water during sample weighing. This suggests the framework was stable up to  $\sim 250$  °C, which is similar to **NTU-105**.

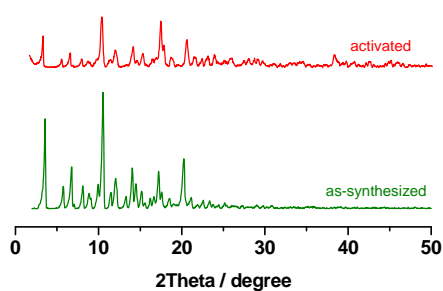

**Fig. S5** XRD pattern of desolvated **Cu-ABTA** (indicating the framework was retained well after activation).

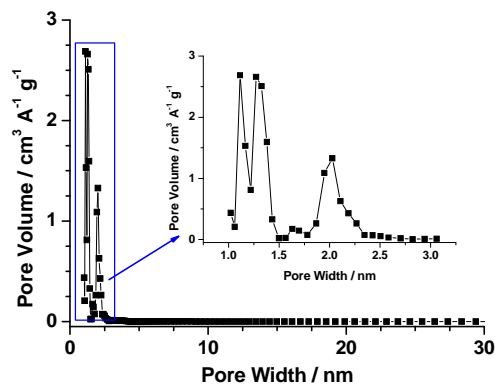

**Fig. S6** Pore-size distribution plot for Cu-ABTA as calculated from experimental N<sub>2</sub> adsorption isotherm using the nonlocal density functional theory (NLDFT).

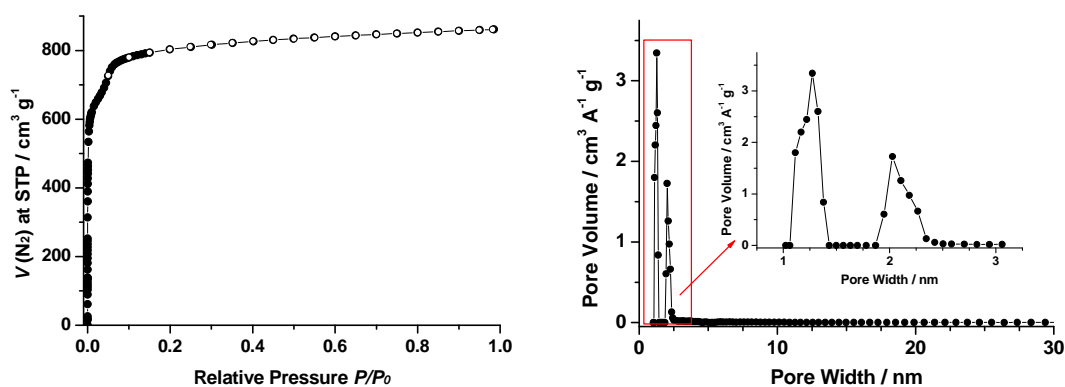

**Fig. S7** N<sub>2</sub> sorption isotherm (left) at 77 K and pore-size distribution plot (right) for NTU-105 as calculated from experimental N<sub>2</sub> adsorption isotherm using the NLDFT.

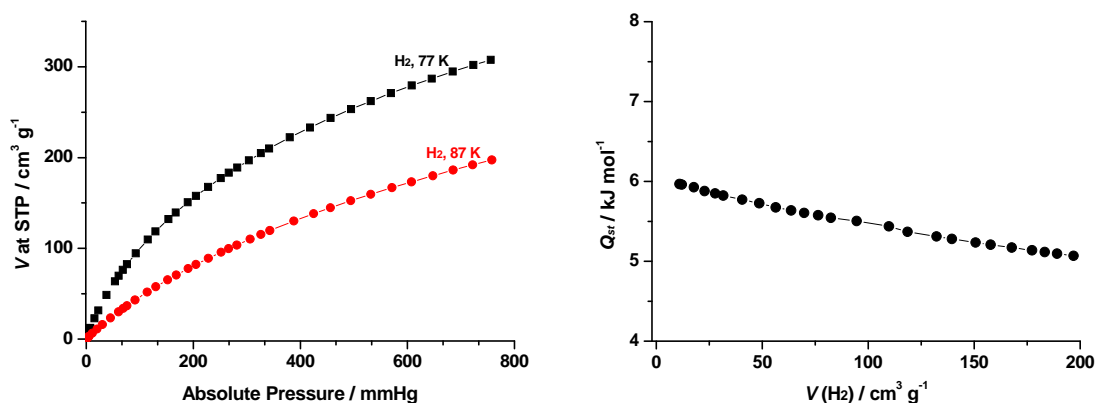

**Fig. S8** H<sub>2</sub> adsorption isotherms (left) and isosteric heat of H<sub>2</sub> adsorption (right) for NTU-105 calculated from the adsorption isotherms at 77 K and 78 K.

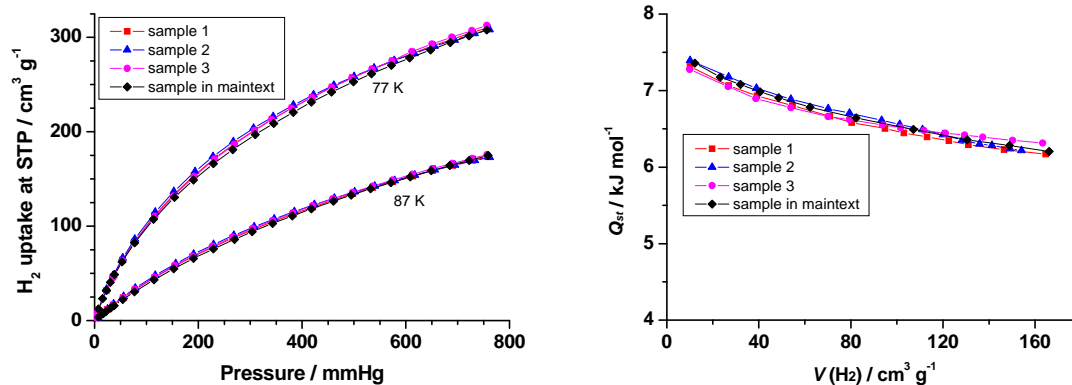

**Fig. S9** Another three hydrogen sorption measurements for MOF **Cu-ABTA** (and corresponding  $Q_{st}$  calculated from the adsorption isotherms at 77 K and 78 K) by using different samples every time to avoid the accidental error. These indicated the good reproducibility.

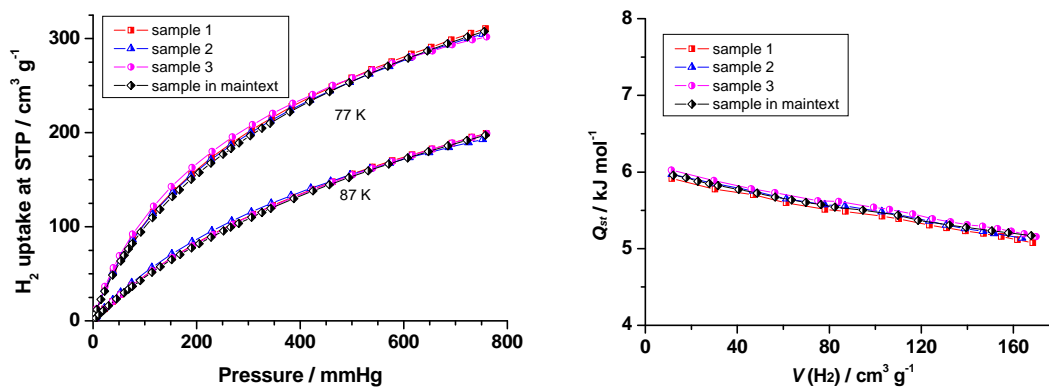

**Fig. S10** Another three hydrogen sorption measurements for MOF **NTU-105** (and corresponding  $Q_{st}$  calculated from the adsorption isotherms at 77 K and 78 K) by using different samples every time to avoid the accidental error. These indicated the good reproducibility.

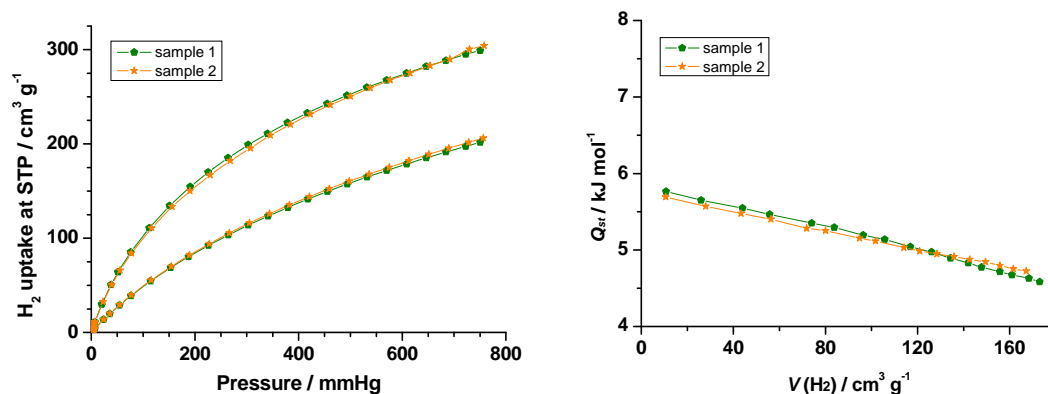

**Fig. S11** Two hydrogen sorption measurements for MOF **Cu-TPBTM** (the ligand is connected by three amide groups, *J. Am. Chem. Soc.*, 2011, **133**, 748.) (and corresponding  $Q_{st}$  calculated from the adsorption isotherms at 77 K and 78 K) by using two different samples.

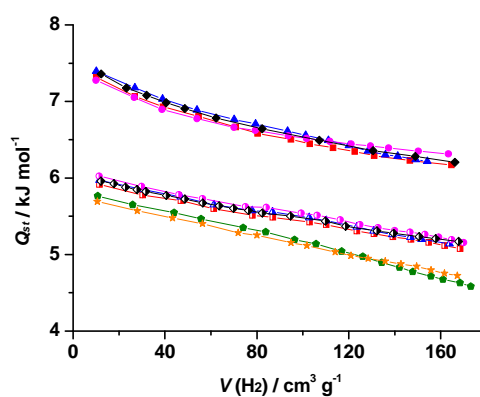

**Fig. S12** The comparison of  $Q_{st}$  for hydrogen adsorption of MOFs **Cu-ABTA**, **NTU-105** and **Cu-TPBTM**. As shown in **Fig. S9-12**, although there are no huge differences in the amount of hydrogen gas uptake among these three MOFs, however, some differences of the isosteric heat of adsorption ( $Q_{st}$ ) are presented. The results show that the  $Q_{st}$  of our reported MOF **Cu-ABTA** is higher than both of **NTU-105** and **Cu-TPBTM** instead of in between of them ( $\text{Cu-ABTA} > \text{NTU-105} > \text{Cu-TPBTM}$ ).

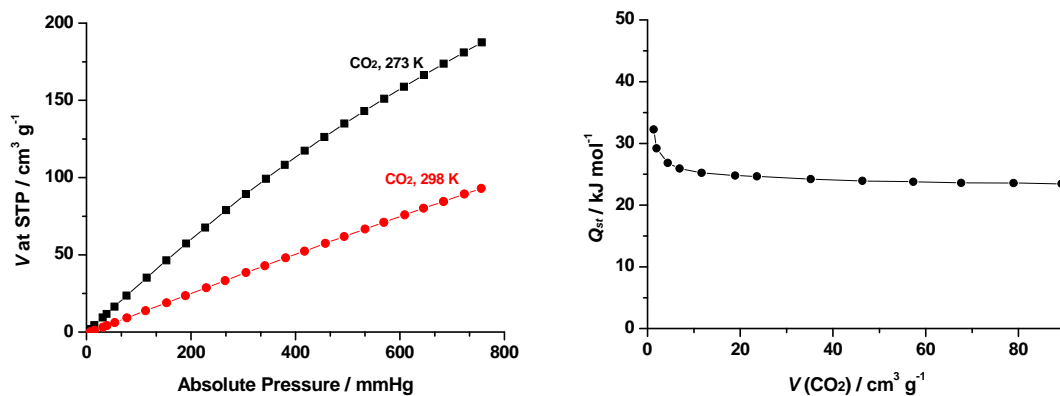

**Fig. S13** CO<sub>2</sub> adsorption isotherms (left) and isosteric heat of CO<sub>2</sub> adsorption (right) for NTU-105 calculated from the adsorption isotherms at 273 K and 298 K.

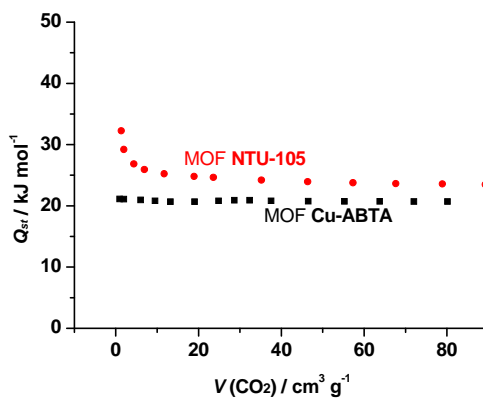

**Fig. S14** Comparison of isosteric heat for CO<sub>2</sub> adsorption of MOF Cu-ABTA and NTU-105 under the same uptake amount.



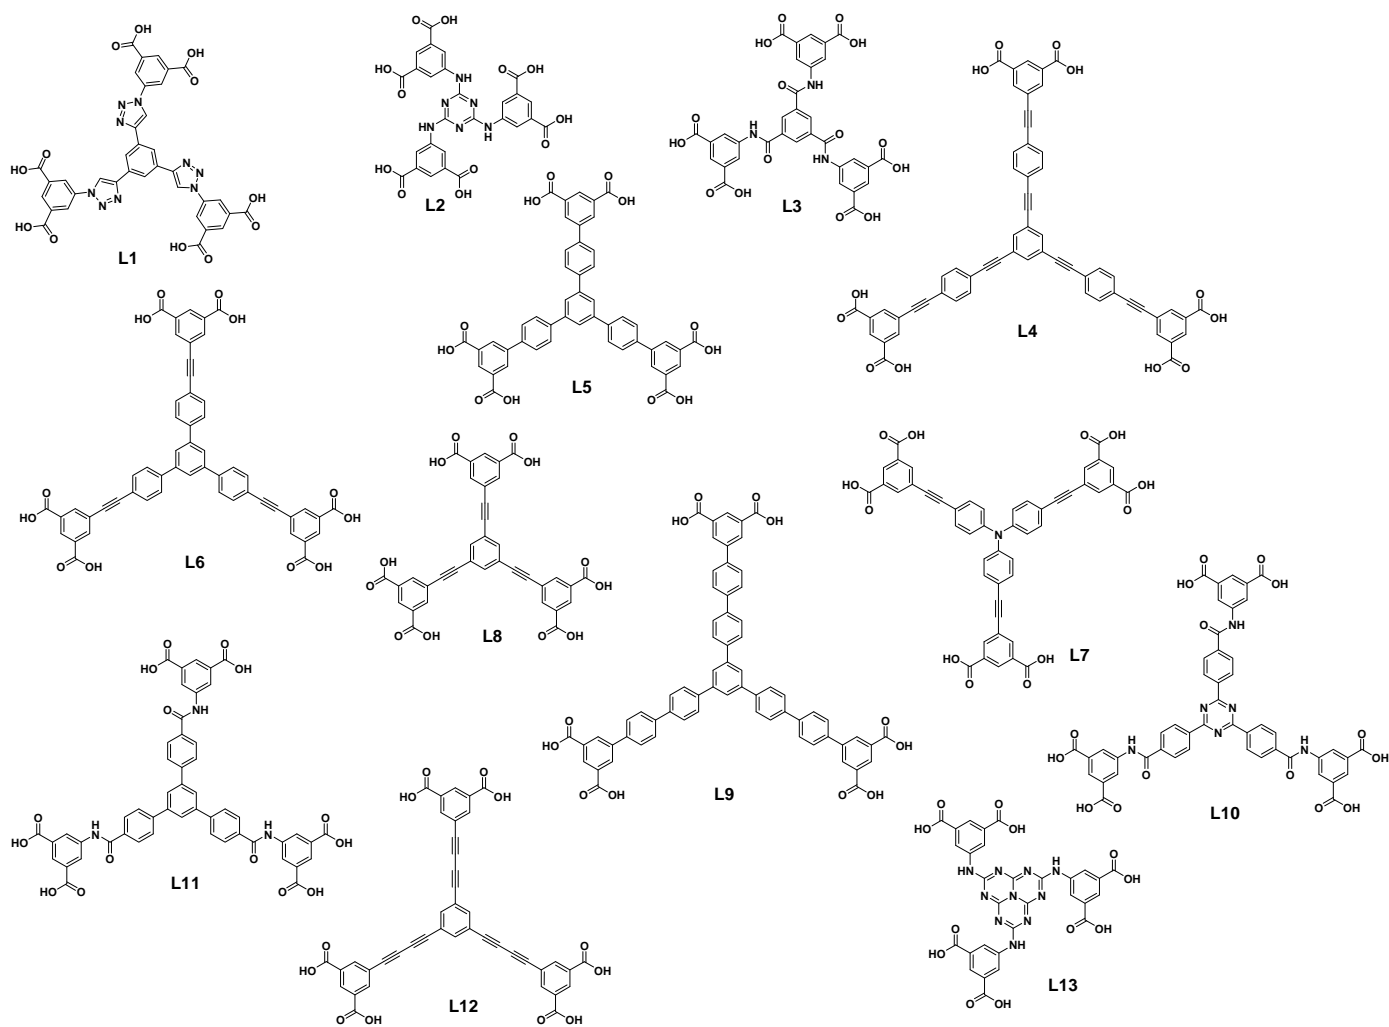

**Scheme S2.** The chemical structure of reported  $C_3$ -symmetric ligands used in constructing *rht*-type MOFs.

**Table S1.** Summary of the porosities, and gas uptake capacities of various *rth*-type MOFs.

| MOF [ligand]                     | $S_{\text{BET}}$ [ $\text{m}^2 \text{g}^{-1}$ ] <sup>a</sup> | $V_{\text{pore}}$ [ $\text{cm}^3 \text{g}^{-1}$ ] <sup>a</sup> | $\text{H}_2$ uptake [wt%] <sup>b</sup> | $\text{CO}_2$ uptake [wt%] <sup>c</sup> | ref.      |
|----------------------------------|--------------------------------------------------------------|----------------------------------------------------------------|----------------------------------------|-----------------------------------------|-----------|
| <b>Cu-ABTA [H6-1]</b>            | 2840                                                         | 1.19                                                           | 2.75                                   | 30.1                                    | This work |
| <b>NTU-105<sup>d</sup> [L1]</b>  | 3543                                                         | 1.33                                                           | 2.75                                   | 36.7                                    | S1        |
| <b>Cu-TDPAT<sup>e</sup> [L2]</b> | 1938                                                         | 0.93                                                           | 2.65                                   | 44.5                                    | S2        |
| <b>Cu-TPBTM [L3]</b>             | 3160                                                         | 1.27                                                           | —                                      | 42.6                                    | S3        |
| <b>NU-100<sup>f</sup> [L4]</b>   | 6143                                                         | 2.82                                                           | 1.82                                   | 12.3 <sup>g</sup>                       | S4        |
| <b>NOTT-112 [L5]</b>             | 3800                                                         | 1.62                                                           | 2.3                                    | —                                       | S5        |
| <b>PCN-68<sup>h</sup> [L6]</b>   | 5109                                                         | 2.13                                                           | 1.87                                   | —                                       | S6        |
| <b>PCN-66 [L7]</b>               | 4000                                                         | 1.63                                                           | 1.79                                   | —                                       | S6,S7     |
| <b>PCN-61 [L8]</b>               | 3000                                                         | 1.36                                                           | 2.25                                   | —                                       | S6,S7     |
| <b>PCN-69<sup>i</sup> [L9]</b>   | 3989                                                         | 2.17                                                           | 1.72                                   | —                                       | S8        |
| <b>Cu-TATB [L10]</b>             | 3360                                                         | 1.91                                                           | —                                      | 17.3                                    | S9        |
| <b>Cu-BTB [L11]</b>              | 3288                                                         | 1.77                                                           | —                                      | 17.2                                    | S9        |
| <b>NU-111 [L12]</b>              | 5000                                                         | 2.38                                                           | 2.1                                    | —                                       | S10       |
| <b>rht-MOF-9 [L13]</b>           | 2420 <sup>j</sup>                                            | 1.01 <sup>j</sup>                                              | 2.72                                   | 25.3                                    | S11       |

<sup>a</sup>calculated from  $\text{N}_2$  isotherms at 77 K; <sup>b</sup>at 77 K, 1 atm; <sup>c</sup>at 273 K, 1 atm; <sup>d</sup>also known as NOTT-122<sup>S12</sup> or NU-125<sup>S13</sup>; <sup>e</sup>also known as rth-MOF-7<sup>S14</sup>; <sup>f</sup>also known as PCN-610<sup>S6</sup>; <sup>g</sup>data at 298 K, 1 atm, due to the absence of the data at 273 K, 1 atm; <sup>h</sup>also known as NOTT-116<sup>S15</sup>; <sup>i</sup>also known as NOTT-119<sup>S16</sup>; <sup>j</sup>calculated from Ar isotherms at 87 K

## References:

- S1. X.-J. Wang, P.-Z. Li, Y. Chen, Q. Zhang, H. Zhang, X. X. Chan, R. Ganguly, Y. Li, J. Jiang and Y. Zhao, *Sci. Rep.*, 2013, **3**, 1149.
- S2. B. Li, Z. Zhang, Y. Li, K. Yao, Y. Zhu, Z. Deng, F. Yang, X. Zhou, G. Li, H. Wu, N. Nijem, Y. J. Chabal, Z. Lai, Y. Han, Z. Shi, S. Feng and J. Li, *Angew. Chem. Int. Ed.*, 2012, **51**, 1412.
- S3. B. Zheng, J. Bai, J. Duan, L. Wojtas and M. J. Zaworotko, *J. Am. Chem. Soc.*, 2011, **133**, 748.
- S4. O. K. Farha, A. Özgür Yazaydın, I. Eryazici, C. D. Malliakas, B. G. Hauser, M. G. Kanatzidis, S. T. Nguyen, R. Q. Snurr and J. T. Hupp, *Nat Chem*, 2010, **2**, 944.

- S5. Y. Yan, X. Lin, S. Yang, A. J. Blake, A. Dailly, N. R. Champness, P. Hubberstey and M. Schroder, *Chem. Commun.*, 2009, 1025.
- S6. D. Yuan, D. Zhao, D. Sun and H.-C. Zhou, *Angew. Chem. Int. Ed.*, 2010, **49**, 5357.
- S7. D. Zhao, D. Yuan, D. Sun and H.-C. Zhou, *J. Am. Chem. Soc.*, 2009, **131**, 9186.
- S8. D. Yuan, D. Zhao and H.-C. Zhou, *Inorg. Chem.*, 2011, **50**, 10528.
- S9. B. Zheng, Z. Yang, J. Bai, Y. Li and S. Li, *Chem. Commun.*, 2012, **48**, 7025.
- S10. O. K. Farha, C. E. Wilmer, I. Eryazici, B. G. Hauser, P. A. Parilla, K. O'Neill, A. A. Sarjeant, S. T. Nguyen, R. Q. Snurr and J. T. Hupp, *J. Am. Chem. Soc.*, 2012, **134**, 9860.
- S11. R. Luebke, Ł. J. Weseliński, Y. Belmabkhout, Z. Chen, Ł. Wojtas and M. Eddaoudi, *Cryst. Growth Des.*, 2014, **14**, 414.
- S12. Y. Yan, M. Suyetin, E. Bichoutskaia, A. J. Blake, D. R. Allan, S. A. Barnett and M. Schroder, *Chem. Sci.*, 2013, **4**, 1731.
- S13. C. E. Wilmer, O. K. Farha, T. Yildirim, I. Eryazici, V. Krungleviciute, A. A. Sarjeant, R. Q. Snurr and J. T. Hupp, *Energy Environ. Sci.*, 2013, **6**, 1158.
- S14. R. Luebke, J. F. Eubank, A. J. Cairns, Y. Belmabkhout, L. Wojtas and M. Eddaoudi, *Chem. Commun.*, 2012, **48**, 1455.
- S15. Y. Yan, I. Telepeni, S. Yang, X. Lin, W. Kockelmann, A. Dailly, A. J. Blake, W. Lewis, G. S. Walker, D. R. Allan, S. A. Barnett, N. R. Champness and M. Schröder, *J. Am. Chem. Soc.*, 2010, **132**, 4092.
- S16. Y. Yan, S. Yang, A. J. Blake, W. Lewis, E. Poirier, S. A. Barnett, N. R. Champness and M. Schroder, *Chem. Commun.*, 2011, **47**, 9995.
